# Supplementary material for: Phytochemicals from the Cocoa Shell Modulate Mitochondrial Function, Lipid and Glucose Metabolism in Hepatocytes via Activation of FGF21/ERK, AKT, and mTOR Pathways
Source: MDPI journal article supplement (doi:10.3390/antiox11010136), 2022-01-08
Supplement: s1 [file s1]

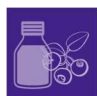

## Article

# Phytochemicals from the Cocoa Shell Modulate Mitochondrial Function, Lipid and Glucose Metabolism in Hepatocytes via Activation of FGF21/ERK, AKT, and mTOR Pathways

Miguel Rebollo-Hernanz <sup>1,2,3</sup>, Yolanda Aguilera <sup>1,2</sup>, Maria A. Martin-Cabrejas <sup>1,2</sup> and Elvira Gonzalez de Mejia <sup>3,\*</sup>

<sup>1</sup> Department of Agricultural Chemistry and Food Science, Universidad Autónoma de Madrid, 28049 Madrid, Spain; miguel.rebollo@uam.es (M.R.H.); yolanda.aguilera@uam.es (Y.A.); maria.martin@uam.es (M.A.M.C.)

<sup>2</sup> Institute of Food Science Research, CIAL (UAM-CSIC), 28049 Madrid, Spain

<sup>3</sup> Department of Food Science and Human Nutrition, University of Illinois at Urbana-Champaign, Urbana, IL 61801, USA

\* Correspondence: edemejia@illinois.edu; Tel.: +1-217-244-3196 (E.G.d.M.)

**Abstract:** The cocoa shell is a by-product that may be revalorized as a source of bioactive compounds to prevent chronic cardiometabolic diseases. This study aimed to investigate the phytochemicals from cocoa shell as targeted compounds for activating fibroblast growth factor 21 (FGF21) signaling and regulating non-alcoholic fatty liver disease (NAFLD)-related biomarkers linked to oxidative stress, mitochondrial function, and metabolism in hepatocytes. HepG2 cells treated with palmitic acid (PA, 500  $\mu\text{mol L}^{-1}$ ) were used in a NAFLD cell model. Phytochemicals from cocoa shell (50  $\mu\text{mol L}^{-1}$ ) and an aqueous extract (CAE, 100  $\mu\text{g mL}^{-1}$ ) enhanced ERK1/2 phosphorylation (1.7 to 3.3-fold) and FGF21 release (1.4 to 3.4-fold). Mitochondrial function (mitochondrial respiration and ATP production) was protected. Cocoa shell phytochemicals reduced lipid accumulation (53–115%) and fatty acid synthase activity (59–93%) and prompted CPT-1 activity. Glucose uptake and glucokinase activity were enhanced, whereas glucose production and phosphoenolpyruvate carboxykinase activity diminished. The increase in the phosphorylation of the insulin receptor, AKT, AMPK $\alpha$ , mTOR, and ERK1/2 conduced to the regulation of hepatic mitochondrial function and energy metabolism. For the first time, the cocoa shell phytochemicals are proved to modulate FGF21 signaling. Results demonstrate the *in vitro* preventive effect of the phytochemicals from cocoa shell on NAFLD.

**Keywords:** cocoa shell; cocoa by-products; antioxidants; theobromine; phenolic compounds; phytochemicals; non-alcoholic fatty liver disease; oxidative stress; mitochondrial function; metabolism

**Supplementary Table S1.** Identification parameters and phytochemical composition of cocoa shell aqueous extract (CAE) characterized by UPLC-ESI-MS/MS. Values are expressed as mean  $\pm$  SD ( $n = 3$ ).

| Compound                           | R <sub>t</sub><br>(min) | Mass spectral data       |                       | Concentration<br>(μg/g extract) | % of Σ<br>negative mode | Chemical<br>structure                                                                 |
|------------------------------------|-------------------------|--------------------------|-----------------------|---------------------------------|-------------------------|---------------------------------------------------------------------------------------|
|                                    |                         | [M–H] <sup>–</sup> (m/z) | MS <sup>2</sup> (m/z) |                                 |                         |                                                                                       |
| <b>Hydroxybenzoic acids</b>        |                         |                          |                       |                                 |                         |                                                                                       |
| Gallic acid                        | 1.73                    | 169                      | 125                   | 19.2 ± 0.4                      | 1.1                     |    |
| Protocatechuic acid                | 3.34                    | 153                      | 109                   | 761.5 ± 47.6                    | 45.0                    |    |
| 4-hydroxybenzoic acid              | 4.43                    | 137                      | 93                    | 70.1 ± 9.3                      | 4.1                     |    |
| Salicylic acid                     | 8.96                    | 137                      | 93                    | 3.3 ± 0.2                       | 0.2                     |    |
| <b>Hydroxycinnamic acids</b>       |                         |                          |                       |                                 |                         |                                                                                       |
| Caffeic acid                       | 5.48                    | 179                      | 135                   | 1.9 ± 0.2                       | 0.1                     |    |
| <i>p</i> -coumaric acid            | 6.81                    | 163                      | 119                   | 4.2 ± 0.6                       | 0.2                     |    |
| <b>Mandelic acids</b>              |                         |                          |                       |                                 |                         |                                                                                       |
| Mandelic acid                      | 4.63                    | 151                      | 107                   | 11.18 ± 1.2                     | 0.7                     |    |
| <b>Phenylacetic acids</b>          |                         |                          |                       |                                 |                         |                                                                                       |
| 3,4-dihydroxyphenylacetic acid     | 4.18                    | 167                      | 123                   | 25.9 ± 2.4                      | 1.5                     |    |
| 4-hydroxyphenylacetic acid         | 5.22                    | 151                      | 107                   | 48.5 ± 4.3                      | 2.9                     |   |
| <b>Flavan-3-ols: monomers</b>      |                         |                          |                       |                                 |                         |                                                                                       |
| (+)-catechin                       | 5.80                    | 289                      | 245                   | 200.8 ± 16.0                    | 11.9                    |  |
| (–)-epicatechin                    | 6.27                    | 289                      | 245                   | 222.1 ± 13.8                    | 13.1                    |  |
| <b>Flavan-3-ols: dimers</b>        |                         |                          |                       |                                 |                         |                                                                                       |
| Procyanidin B1                     | 4.90                    | 577                      | 289                   | 83.6 ± 7.8                      | 4.9                     |  |
| Procyanidin B2                     | 5.93                    | 577                      | 289                   | 219.9 ± 11.4                    | 13.0                    |  |
| <b>Flavonols</b>                   |                         |                          |                       |                                 |                         |                                                                                       |
| Quercetin-3- <i>O</i> -galactoside | 8.34                    | 463                      | 301                   | 9.3 ± 0.4                       | 0.5                     |  |
| Quercetin-3- <i>O</i> -glucoside   | 8.65                    | 463                      | 301                   | 11.12 ± 0.77                    | 0.7                     |  |
| Compound                           | R <sub>t</sub><br>(min) | Mass spectral data       |                       | Concentration<br>(μg/g extract) | % of Σ<br>positive mode | Chemical<br>structure                                                                 |
| <b>Alkaloids</b>                   |                         |                          |                       |                                 |                         |                                                                                       |
| Theobromine                        | 2.67                    | 181                      | 138                   | 10035.0 ± 4.5                   | 80.5                    |  |
| Caffeine                           | 5.46                    | 195                      | 138                   | 2433.5 ± 7.8                    | 19.5                    |  |

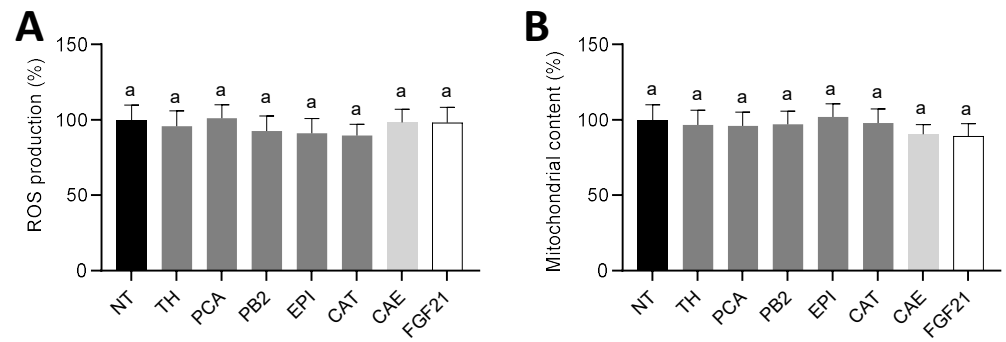

**Supplementary Figure S1.** Effects of pure phytochemicals from cocoa shell ( $50 \mu\text{mol L}^{-1}$ ), aqueous extract (CAE,  $100 \mu\text{g mL}^{-1}$ ), and FGF21 ( $20 \text{ nmol L}^{-1}$ ) on reactive oxygen species (ROS) production (A) and mitochondrial content (B) in HepG2 human hepatocytes. The results are expressed as mean  $\pm$  SD ( $n = 3$ ). Bars with different letters significantly ( $p < 0.05$ ) differ according to ANOVA and Tukey's multiple range test. NT: non-treated cells; TH: theobromine; PCA: procatechuic acid; PB2: procyanidin B2; EPI: epicatechin; CAT: catechin; FGF21: fibroblast growth factor 21.
